# Supplementary material
Source: Elsevier journal article supplement (https://www.sciencedirect.com/science/article/pii/S1887836919300018)
Supplement: mmc1 [file S1887836919300018:mmc1.docx]

**Anexo I – Diagnóstico energético**

**ELEMENTO FUEGO**

**¿Es habitual en ti...?**

A la hora de responder a cada pregunta, piensa en tu vida cotidiana, en lo que es habitual en tu caso la mayor parte del tiempo en tu vida y en lo que te suele pasar en período de preparación de exámenes.

**• Tener palpitaciones:**

- Sí, siempre. Se mantiene igual esté o no en exámenes.
- Sí, siempre, y más en exámenes.
- No, nunca.
- Solo en exámenes.

**• Tener dificultades de concentración:**

- Sí, siempre. Se mantiene igual esté o no en exámenes.
- Sí, siempre, y más en exámenes.
- No, nunca.
- Solo en exámenes.

**• Dormir menos de 7-8 h:**

- Sí, siempre. Se mantiene igual esté o no en exámenes.
- Sí, siempre, y más en exámenes.
- No, nunca.
- Solo en exámenes.

**• Tomar más de un café al día:**

- Sí, siempre. Se mantiene igual esté o no en exámenes.
- Sí, siempre, y más en exámenes.
- No, nunca.
- Solo en exámenes.

**• Tener períodos de depresión:**

- Sí, siempre. Se mantiene igual esté o no en exámenes.
- Sí, siempre, y más en exámenes.
- No, nunca.
- Solo en exámenes.

**• Tener períodos de afonía:**

- Sí, siempre. Se mantiene igual esté o no en exámenes.
- Sí, siempre, y más en exámenes.
- No, nunca.
- Solo en exámenes

**• Sentir presión en el pecho:**

- Sí, siempre. Se mantiene igual esté o no en exámenes.
- Sí, siempre, y más en exámenes.
- No, nunca.
- Solo en exámenes.

**• Tener períodos de angustia, de sentirte angustiado:**

- Sí, siempre. Se mantiene igual esté o no en exámenes.
- Sí, siempre, y más en exámenes.
- No, nunca.
- Solo en exámenes.

**• Tener tartamudeo:**

- Sí, siempre. Se mantiene igual esté o no en exámenes.
- Sí, siempre, y más en exámenes.
- No, nunca.
- Solo en exámenes.

**• Tener llagas en la boca, la lengua o las encías:**

- Sí, siempre. Se mantiene igual esté o no en exámenes.
- Sí, siempre, y más en exámenes.
- No, nunca.
- Solo en exámenes.

**• Tener sudoración excesiva en las manos:**

- Sí, siempre. Se mantiene igual esté o no en exámenes.
- Sí, siempre, y más en exámenes.
- No, nunca.
- Solo en exámenes.

**• Tener necesidad de beber agua a menudo:**

- Sí, siempre. Se mantiene igual esté o no en exámenes.
- Sí, siempre, y más en exámenes.
- No, nunca.
- Solo en exámenes.

**• Tener sofocos, sensación de calor en la cara:**

- Sí, siempre. Se mantiene igual esté o no en exámenes.
- Sí, siempre, y más en exámenes.
- No, nunca.
- Solo en exámenes.

**• ¿Te consideras una persona alegre, optimista la mayor parte del tiempo?**

- Sí.
- No.

**• Durante la época de preparación de exámenes, ¿sueles estar alegre, optimista la mayor parte del tiempo?**

- Sí.
- No.

**ELEMENTO BAZO**

**¿Es habitual en ti...?**

A la hora de responder a cada pregunta, piensa en tu vida cotidiana, en lo que es habitual en tu caso la mayor parte del tiempo en tu vida y en lo que te suele pasar en período de preparación de exámenes.

**• Tener problemas digestivos (digestiones pesadas, hinchazón abdominal, gases, etc.:**

- Sí, siempre. Se mantiene igual esté o no en exámenes.
- Sí, siempre, y más en exámenes.
- No, nunca.
- Solo en exámenes.

**• Hacerte hematomas con facilidad:**

- Sí, siempre. Se mantiene igual esté o no en exámenes.
- Sí, siempre, y más en exámenes.
- No, nunca.
- Solo en exámenes.

**• Darle muchas vueltas a las cosas:**

- Sí, siempre. Se mantiene igual esté o no en exámenes.
- Sí, siempre, y más en exámenes.
- No, nunca.
- Solo en exámenes.

**• Tener dolor de estómago:**

- Sí, siempre. Se mantiene igual esté o no en exámenes.
- Sí, siempre, y más en exámenes.
- No, nunca.
- Solo en exámenes.

**• Tener ardor:**

- Sí, siempre. Se mantiene igual esté o no en exámenes.
- Sí, siempre, y más en exámenes.
- No, nunca.
- Solo en exámenes.

**• Tener hambre, sensación de estómago vacío, necesidad de comer (no comer por comer):**

- Sí, siempre. Se mantiene igual esté o no en exámenes.
- Sí, siempre, y más en exámenes.
- No, nunca.
- Solo en exámenes.

**• No tener hambre, sensación de estómago cerrado, comer por comer:**

- Sí, siempre. Se mantiene igual esté o no en exámenes.
- Sí, siempre, y más en exámenes.
- No, nunca.
- Solo en exámenes.

**• Tener deseo de comer algo dulce:**

- Sí, siempre. Se mantiene igual esté o no en exámenes.
- Sí, siempre, y más en exámenes.
- No, nunca.
- Solo en exámenes.

**ELEMENTO METAL**

**¿Es habitual en ti...?**

A la hora de responder a cada pregunta, piensa en tu vida cotidiana, en lo que es habitual en tu caso la mayor parte del tiempo en tu vida y en lo que te suele pasar en período de preparación de exámenes.

**• ¿Tienes alergia?**

- Sí, siempre. Se mantiene igual esté o no en exámenes.
- Sí, siempre, y más en exámenes.
- No, nunca.
- Solo en exámenes.

**• ¿Fumas?**

- Sí, siempre. Se mantiene igual esté o no en exámenes.
- Sí, siempre, y más en exámenes.
- No, nunca.
- Solo en exámenes.

**• ¿Te resfrías con facilidad?**

- Sí, siempre. Se mantiene igual esté o no en exámenes.
- Sí, siempre, y más en exámenes.
- No, nunca.
- Solo en exámenes.

**• ¿Tienes diarreas?**

- Sí, siempre. Se mantiene igual esté o no en exámenes.
- Sí, siempre, y más en exámenes.
- No, nunca.
- Solo en exámenes.

**• ¿Tienes estreñimiento?**

- Sí, siempre. Se mantiene igual esté o no en exámenes.
- Sí, siempre, y más en exámenes.
- No, nunca.
- Solo en exámenes.

**• ¿Te entristeces con facilidad?**

- Sí, siempre. Se mantiene igual esté o no en exámenes.
- Sí, siempre, y más en exámenes.
- No, nunca.
- Solo en exámenes.

**• ¿Tienes bronquitis?**

- Sí, siempre. Se mantiene igual esté o no en exámenes.
- Sí, siempre, y más en exámenes.
- No, nunca.
- Solo en exámenes.

**• ¿Tienes asma?**

- Sí, siempre. Se mantiene igual esté o no en exámenes.
- Sí, siempre, y más en exámenes.
- No, nunca.
- Solo en exámenes.

**ELEMENTO MADERA**

**¿Es habitual en ti...?**

A la hora de responder a cada pregunta, piensa en tu vida cotidiana, en lo que es habitual en tu caso la mayor parte del tiempo en tu vida y en lo que te suele pasar en período de preparación de exámenes.

**• ¿Sueles tener dolores en el cuello o la zona dorsal alta por tensión o contracturas?**

- Sí, siempre. Se mantiene igual esté o no en exámenes.
- Sí, siempre, y más en exámenes.
- No, nunca.
- Solo en exámenes.

**• ¿Tienes rechinar de dientes nocturno?**

- Sí, siempre. Se mantiene igual esté o no en exámenes.
- Sí, siempre, y más en exámenes.
- No, nunca.
- Solo en exámenes.

**• ¿Tienes varices, hormigueos o problemas circulatorios?**

- Sí, siempre. Se mantiene igual esté o no en exámenes.
- Sí, siempre, y más en exámenes.
- No, nunca.
- Solo en exámenes.

**• ¿Tienes hemorroides?**

- Sí, siempre. Se mantiene igual esté o no en exámenes.
- Sí, siempre, y más en exámenes.
- No, nunca.
- Solo en exámenes.

**• ¿Te enfadas con facilidad?**

- Sí, siempre. Se mantiene igual esté o no en exámenes.
- Sí, siempre, y más en exámenes.
- No, nunca.
- Solo en exámenes.

**• Cuando te enfadas, ¿eres de las personas que lo expresan de alguna manera?**

- Sí, siempre. Se mantiene igual esté o no en exámenes
- Sí, siempre, y más en exámenes
- No, nunca.
- Solo en exámenes.

**• ¿Sueles tener dolor en la zona lumbar?**

- Sí, siempre. Se mantiene igual esté o no en exámenes
- Sí, siempre, y más en exámenes
- No, nunca.
- Solo en exámenes.

**• ¿Sueles tener cefaleas/migrañas?**

- Sí, siempre. Se mantiene igual esté o no en exámenes
- Sí, siempre, y más en exámenes
- No, nunca.
- Solo en exámenes.

**ELEMENTO AGUA**

**¿Es habitual en ti...?**

A la hora de responder a cada pregunta, piensa en tu vida cotidiana, en lo que es habitual en tu caso la mayor parte del tiempo en tu vida y en lo que te suele pasar en período de preparación de exámenes.

**• ¿Te levantas cansado aunque hayas dormido lo suficiente?**

- Sí, siempre. Se mantiene igual esté o no en exámenes
- Sí, siempre, y más en exámenes
- No, nunca.
- Solo en exámenes.

**• ¿Te despiertas descansado pero te vas agotando conforme pasa el día?**

- Sí, siempre. Se mantiene igual esté o no en exámenes
- Sí, siempre, y más en exámenes
- No, nunca.
- Solo en exámenes.

**• ¿Tienes infecciones de orina?**

- Sí, siempre. Se mantiene igual esté o no en exámenes
- Sí, siempre, y más en exámenes
- No, nunca.
- Solo en exámenes.

**• ¿Tienes cólicos nefríticos?**

- Sí, siempre. Se mantiene igual esté o no en exámenes
- Sí, siempre, y más en exámenes
- No, nunca.
- Solo en exámenes.

**• ¿Eres una persona asustadiza, miedosa o te sobresaltas con facilidad?**

- Sí, siempre. Se mantiene igual esté o no en exámenes
- Sí, siempre, y más en exámenes
- No, nunca.
- Solo en exámenes.

**• ¿Te despiertas durante la noche a orinar?**

- Sí, siempre. Se mantiene igual esté o no en exámenes
- Sí, siempre, y más en exámenes
- No, nunca.
- Solo en exámenes.

**• Durante el día ¿tienes ganas de orinar de manera frecuente?**

- Sí, siempre. Se mantiene igual esté o no en exámenes
- Sí, siempre, y más en exámenes
- No, nunca.
- Solo en exámenes.

**• ¿Tus menstruaciones son dolorosas hasta incapacitarte o tener que medicarte?**

- Sí, siempre.
- No, nunca.
- Sí, siempre, y más en época de exámenes.
- Nunca, solo en exámenes.
- Esta pregunta no procede en mi caso, soy un hombre.

**• ¿Cada cuántos días suelen ser tus menstruaciones?**

- Menos de 22 días.
- Entre 22 y 31 días.
- Cada más de 31 días.
- No lo sé, no sigue ningún patrón regular.
- Esta pregunta no procede en mi caso, soy un hombre.

**• ¿Se altera tu regularidad en la menstruación durante los exámenes?**

- Sí, se me retrasa.
- Sí, se me adelanta.
- No, no se altera.
- Esta pregunta no procede en mi caso, soy un hombre.
